# Supplementary material
Source: PubMed Central journal article supplement (PMC2797062)

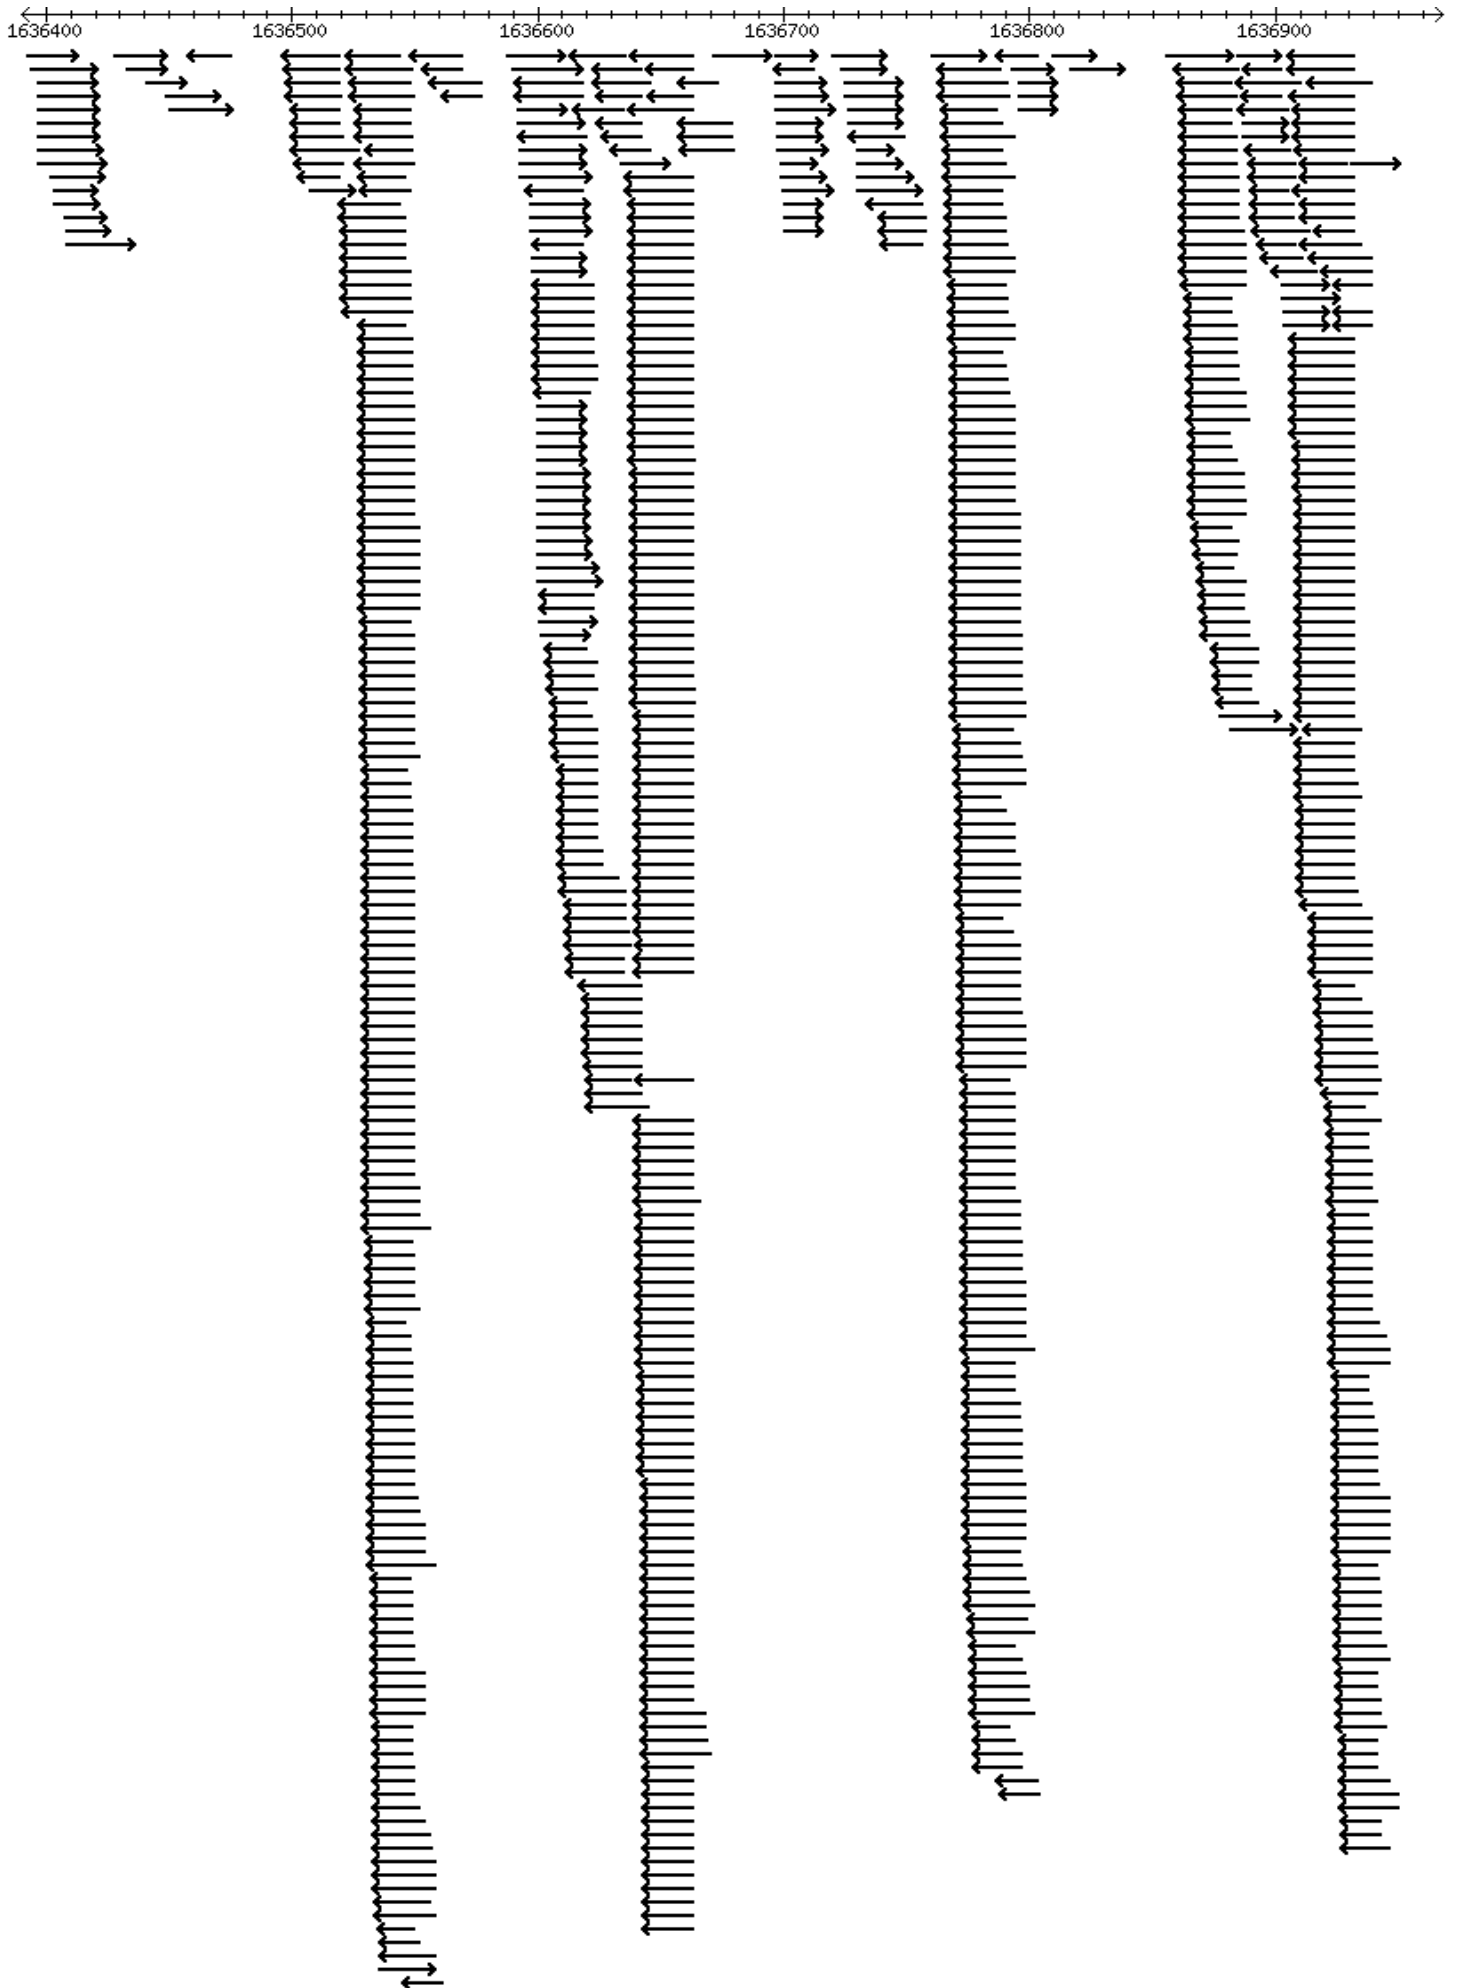

SUPPLEMENTARY FIGURE S6. Distribution of sequenced small RNA in *rdp1Δ* at *cenII dh*.

Supplement: emboj2009351s6.pdf [file emboj2009351s6.pdf]
